# Supplementary material
Source: publisher site journal article supplement (http://www.degruyter.com/publication/journal_key/KIER/downloadAsset/KIER_KIER_KSYB%20Instructions%20for%20Submission.pdf)
Supplement: Supplementary file 1 [file KIER_KIER_KSYB%20Instructions%20for%20Submission.pdf]

# Instructions for the Submission of Manuscripts to the *Kierkegaard Studies Yearbook* and the *Kierkegaard Studies Monograph Series*

Submissions to the *Kierkegaard Studies Yearbook* and the *Kierkegaard Studies Monograph Series* can at any time be sent to the editorial secretary, Peter Šajda at:

[ksy@sk.ku.dk](mailto:ksy@sk.ku.dk)

Both the *Kierkegaard Studies Yearbook* and the *Kierkegaard Studies Monograph Series* are blindly refereed research publications. Two external reviewers assess each submission based on clearly outlined criteria and send a recommendation to the editors (accepted, accepted with revision, rejected) along with a narrative account of their assessment.

Every article should be accompanied by an abstract in English of no more than 100 words. Non-native speakers should have their abstract checked by a native speaker before submission. The abstract should appear after the title and before the article. It should be in the font Times, 12 point.

In order to ensure the anonymity of the submissions, the author's name should not appear in the paper itself, for example, at the end or in a running header. In the paper there should be no self-references, for example, to "my" previous book or article.

The author's name, institutional affiliation and e-mail address should be written on a separate title page. On that separate page, please indicate which of the main area(s) of Kierkegaard studies your paper best falls under:

aesthetics  
analytic philosophy  
ancient philosophy  
anthropology  
Biblical studies  
conceptual analysis  
Danish Golden Age  
education  
ethics  
existentialism  
German idealism  
hermeneutics  
history of reception  
literary theory  
literature  
pastoral care  
philology  
philosophy of action  
philosophy of history  
Post-modernism  
psychology  
social-political philosophy  
source work research  
systematic theology  
other (please specify)

All submissions should be formatted according to the guidelines of the *Kierkegaard Studies Yearbook* and the *Kierkegaard Studies Monograph Series*, which appear below. Failure to comply with this will result in the rejection of the submission.

Papers of longer than 35 (double spaced A4) pages will not be accepted for the *Yearbook*.

The decisions of the referees are final.

The article should be submitted as an MS Word-file.

*Please note: Non-native speakers must have their article checked by a native speaker before submission.  
All quotations and references must be properly cited.*

The *Kierkegaard Studies Yearbook* aims to publish original research; if the submitted paper has previously appeared in another publication, the author should make sure to indicate this to the editorial secretary Peter Šajda ([ksy@sk.ku.dk](mailto:ksy@sk.ku.dk)) upon submission. If the submitted paper is a translation of a paper previously published, this should be indicated, too.

**The deadline for submissions for the *Kierkegaard Studies Yearbook*, is usually December 1st for the following year.**
